# Supplementary material for: 1,4-Diiodotetrafluorobenzene 3,5-Di-(Pyridin-4-Yl)-1,2, 4-Thiadiazole
Source: Preprints.org preprint supplement (doi:10.20944/preprints202403.0264.v1), 2024-03-06

## checkCIF/PLATON report

Structure factors have been supplied for datablock(s) i

THIS REPORT IS FOR GUIDANCE ONLY. IF USED AS PART OF A REVIEW PROCEDURE FOR PUBLICATION, IT SHOULD NOT REPLACE THE EXPERTISE OF AN EXPERIENCED CRYSTALLOGRAPHIC REFEREE.

No syntax errors found.      CIF dictionary      Interpreting this report

### Datablock: i

---

|                        |                       |                                       |
|------------------------|-----------------------|---------------------------------------|
| Bond precision:        | C-C = 0.0071 A        | Wavelength=0.71073                    |
| Cell:                  | a=5.6690 (4)          | b=12.3300 (9)      c=14.1339 (9)      |
|                        | alpha=91.644 (6)      | beta=96.314 (6)      gamma=92.400 (6) |
| Temperature:           | 173 K                 |                                       |
|                        | Calculated            | Reported                              |
| Volume                 | 980.54 (12)           | 980.54 (12)                           |
| Space group            | P -1                  | P -1                                  |
| Hall group             | -P 1                  | -P 1                                  |
| Moiety formula         | C12 H8 N4 S, C6 F4 I2 | C12 H8 N4 S, C6 F4 I2                 |
| Sum formula            | C18 H8 F4 I2 N4 S     | C18 H8 F4 I2 N4 S                     |
| Mr                     | 642.14                | 642.14                                |
| Dx, g cm <sup>-3</sup> | 2.175                 | 2.175                                 |
| Z                      | 2                     | 2                                     |
| Mu (mm <sup>-1</sup> ) | 3.363                 | 3.363                                 |
| F000                   | 604.0                 | 604.0                                 |
| F000'                  | 602.63                |                                       |
| h, k, lmax             | 7, 15, 18             | 7, 15, 18                             |
| Nref                   | 4499                  | 4439                                  |
| Tmin, Tmax             | 0.702, 0.790          | 0.490, 0.790                          |
| Tmin'                  | 0.258                 |                                       |

Correction method= # Reported T Limits: Tmin=0.490 Tmax=0.790  
AbsCorr = MULTI-SCAN

Data completeness= 0.987      Theta(max)= 27.484

|                                |                   |
|--------------------------------|-------------------|
| R(reflections)= 0.0333 ( 3662) | wR2(reflections)= |
| S = 1.043                      | 0.0960 ( 4439)    |
| Npar= 263                      |                   |

---

The following ALERTS were generated. Each ALERT has the format

**test-name\_ALERT\_alert-type\_alert-level.**

Click on the hyperlinks for more details of the test.

---

### Alert level C

PLAT911\_ALERT\_3\_C Missing FCF Refl Between Thmin & STh/L= 0.600 21 Report  
0 4 0, 0 -2 1, -1 -1 1, 1 1 1, 0 3 1, -1 4 1,  
0 -2 2, 1 1 2, 0 2 2, -2 3 2, -1 -2 3, 1 -1 3,  
0 -2 4, -1 0 4, -2 1 4, 0 3 4, -1 2 5, 2 -2 6,  
6 -2 6, 3 3 13, 2 3 15,

PLAT913\_ALERT\_3\_C Missing # of Very Strong Reflections in FCF .... 14 Note  
0 4 0, -1 -1 1, 1 1 1, -1 4 1, 0 -2 2, 1 1 2,  
-2 3 2, -1 -2 3, 1 -1 3, 0 -2 4, -2 1 4, 0 3 4,  
-1 2 5, 2 -2 6,

---

### Alert level G

PLAT154\_ALERT\_1\_G The s.u.'s on the Cell Angles are Equal ..(Note) 0.006 Degree  
PLAT180\_ALERT\_4\_G Check Cell Rounding: # of Values Ending with 0 = 3 Note  
PLAT431\_ALERT\_2\_G Short Inter HL..A Contact I1 ..N1 . 2.80 Ang.  
x,y,z = 1\_555 Check  
PLAT431\_ALERT\_2\_G Short Inter HL..A Contact I2 ..N4 . 2.95 Ang.  
-2+x,1+y,1+z = 1\_366 Check  
PLAT432\_ALERT\_2\_G Short Inter X...Y Contact I2 ..C10 . 3.45 Ang.  
-2+x,1+y,1+z = 1\_366 Check  
PLAT790\_ALERT\_4\_G Centre of Gravity not Within Unit Cell: Resd. # 2 Note  
C6 F4 I2  
PLAT870\_ALERT\_4\_G ALERTS Related to Twinning Effects Suppressed .. ! Info  
PLAT910\_ALERT\_3\_G Missing # of FCF Reflection(s) Below Theta(Min). 2 Note  
0 1 0, 0 0 1,  
PLAT912\_ALERT\_4\_G Missing # of FCF Reflections Above STh/L= 0.600 37 Note  
PLAT931\_ALERT\_5\_G CIFcalcFCF Twin Law ( 1-1 3) Est.d BASF 0.25 Check  
PLAT933\_ALERT\_2\_G Number of HKL-OMIT Records in Embedded .res File 1 Note  
0 1 0,  
PLAT969\_ALERT\_5\_G The 'Henn et al.' R-Factor-gap value ..... 2.91 Note  
Predicted wR2: Based on SigI\*\*2 3.30 or SHELX Weight 9.49

---

- 0 **ALERT level A** = Most likely a serious problem - resolve or explain  
0 **ALERT level B** = A potentially serious problem, consider carefully  
2 **ALERT level C** = Check. Ensure it is not caused by an omission or oversight  
12 **ALERT level G** = General information/check it is not something unexpected

- 1 ALERT type 1 CIF construction/syntax error, inconsistent or missing data  
4 ALERT type 2 Indicator that the structure model may be wrong or deficient  
3 ALERT type 3 Indicator that the structure quality may be low  
4 ALERT type 4 Improvement, methodology, query or suggestion  
2 ALERT type 5 Informative message, check
- 
-

It is advisable to attempt to resolve as many as possible of the alerts in all categories. Often the minor alerts point to easily fixed oversights, errors and omissions in your CIF or refinement strategy, so attention to these fine details can be worthwhile. In order to resolve some of the more serious problems it may be necessary to carry out additional measurements or structure refinements. However, the purpose of your study may justify the reported deviations and the more serious of these should normally be commented upon in the discussion or experimental section of a paper or in the "special\_details" fields of the CIF. checkCIF was carefully designed to identify outliers and unusual parameters, but every test has its limitations and alerts that are not important in a particular case may appear. Conversely, the absence of alerts does not guarantee there are no aspects of the results needing attention. It is up to the individual to critically assess their own results and, if necessary, seek expert advice.

### **Publication of your CIF in IUCr journals**

A basic structural check has been run on your CIF. These basic checks will be run on all CIFs submitted for publication in IUCr journals (*Acta Crystallographica*, *Journal of Applied Crystallography*, *Journal of Synchrotron Radiation*); however, if you intend to submit to *Acta Crystallographica Section C* or *E* or *IUCrData*, you should make sure that full publication checks are run on the final version of your CIF prior to submission.

### **Publication of your CIF in other journals**

Please refer to the *Notes for Authors* of the relevant journal for any special instructions relating to CIF submission.

---

**PLATON version of 06/01/2024; check.def file version of 05/01/2024**

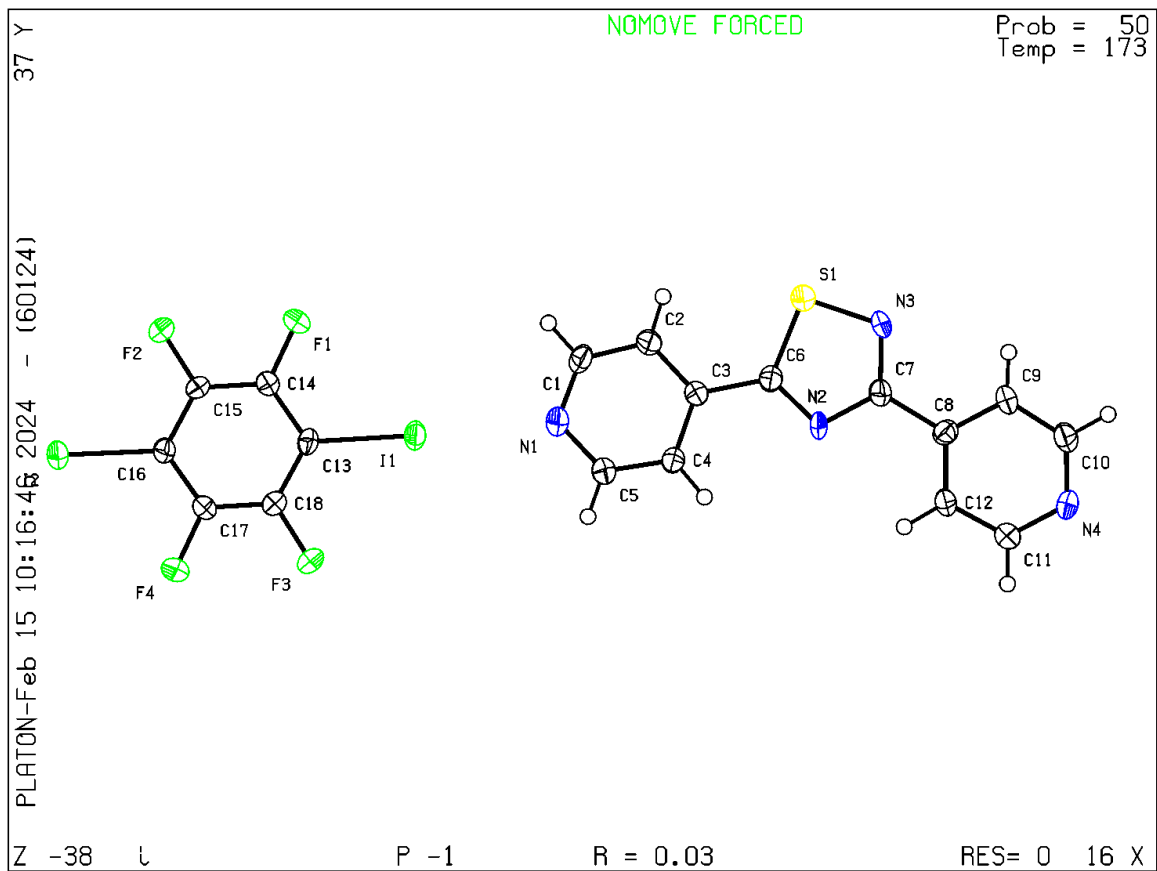

Supplement: Supplementary file 2 [file supplementary]
