# Supplementary material for: 1,4-Diiodotetrafluorobenzene 3,5-Di-(Pyridin-4-Yl)-1,2, 4-Thiadiazole
Source: Preprints.org preprint supplement (doi:10.20944/preprints202403.0264.v1), 2024-03-06
Supplement: Supplementary file 4 [file supplementary]

PLATON ckf file

PLATON/checkCIF FCF Validation Document

PLATON/ASYM-(Version 60124)-[Mode=2] FCF-File Validation for:i

For Documentation: <http://http://www.platonsoft.nl/FCF-VALIDATION.pdf>

## Section 1

## General Data

Crystal Data From: platon.cif

Fo/Fc Data From: platon.fcf FCF-TYPE=LIST4

Space Group : P-1

Wavelength (Ang) : 0.71073

Unit Cell (CIF) : 5.6690 12.3300 14.1339 91.644 96.314 92.400

SHELX WGHT Pars. : 0.0456 2.2153 0.0000 0.0000 0.0000 0.3333

## Section 2

Reflections with  $\text{abs}((I(\text{obs}) - I(\text{calc})) / \text{SigW}(I)) > 3.0$  [I(calc) from FCF]

| Nr | H  | K   | L  | Theta | I(obs)   | I(calc)  | Sigma(I) | Ratio  | SigW(I) | RatioW |
|----|----|-----|----|-------|----------|----------|----------|--------|---------|--------|
| 1  | 3  | 3   | 0  | 12.23 | 4771.16  | 3973.00  | 71.05    | 11.23  | 227.61  | 3.51   |
| 2  | -1 | 7   | 0  | 12.06 | 592.72   | 453.35   | 21.86    | 6.38   | 45.88   | 3.04   |
| 3  | -1 | 10  | 0  | 17.02 | 4735.62  | 3777.57  | 156.22   | 6.13   | 261.50  | 3.66   |
| 4  | -2 | 12  | 0  | 21.30 | 196.10   | 97.94    | 24.57    | 4.00   | 30.47   | 3.22   |
| 5  | 2  | -9  | 1  | 16.57 | 541.27   | 261.90   | 24.18    | 11.55  | 40.41   | 6.91   |
| 6  | 0  | -6  | 1  | 10.03 | 7074.75  | 5950.28  | 186.00   | 6.05   | 363.04  | 3.10   |
| 7  | 2  | -1  | 1  | 7.66  | 3575.69  | 4836.84  | 106.52   | -11.84 | 248.37  | -5.08  |
| 8  | 2  | 0   | 1  | 7.56  | 106.88   | 326.42   | 10.82    | -20.29 | 28.49   | -7.71  |
| 9  | -4 | 2   | 1  | 14.78 | 50.34    | 9.20     | 10.55    | 3.90   | 12.77   | 3.22   |
| 10 | -1 | 5   | 1  | 9.01  | 8513.52  | 6883.85  | 148.19   | 11.00  | 391.30  | 4.16   |
| 11 | 3  | 6   | 1  | 15.44 | 3553.57  | 2809.96  | 101.16   | 7.35   | 190.92  | 3.89   |
| 12 | 2  | -6  | 2  | 12.57 | 3075.56  | 2494.62  | 58.28    | 9.97   | 156.14  | 3.72   |
| 13 | 2  | 2   | 2  | 8.93  | 132.40   | 285.24   | 13.10    | -11.67 | 28.37   | -5.39  |
| 14 | 0  | 6   | 2  | 10.49 | 186.54   | 115.35   | 9.36     | 7.61   | 20.88   | 3.41   |
| 15 | 3  | -13 | 3  | 24.90 | 194.47   | 95.28    | 26.49    | 3.74   | 31.94   | 3.11   |
| 16 | 2  | -11 | 3  | 20.21 | 2603.85  | 2020.27  | 126.46   | 4.61   | 176.35  | 3.31   |
| 17 | -1 | -6  | 3  | 11.36 | 9834.11  | 8307.27  | 153.04   | 9.98   | 452.30  | 3.38   |
| 18 | 0  | -6  | 3  | 10.76 | 72.32    | 28.21    | 10.45    | 4.22   | 14.43   | 3.06   |
| 19 | 4  | -6  | 3  | 18.33 | 191.07   | 402.34   | 24.05    | -8.78  | 39.28   | -5.38  |
| 20 | -2 | -4  | 3  | 10.57 | 6666.73  | 5597.60  | 82.89    | 12.90  | 306.22  | 3.49   |
| 21 | 3  | -2  | 4  | 13.23 | 1022.33  | 1724.13  | 45.41    | -15.45 | 99.90   | -7.02  |
| 22 | 3  | -1  | 4  | 12.99 | 17.47    | 214.80   | 20.74    | -9.51  | 28.40   | -6.95  |
| 23 | 1  | 2   | 4  | 8.07  | 10016.64 | 8311.85  | 195.35   | 8.73   | 470.96  | 3.62   |
| 24 | 0  | 4   | 4  | 8.98  | 8709.94  | 7325.21  | 87.37    | 15.85  | 388.54  | 3.56   |
| 25 | 4  | 5   | 4  | 18.89 | 2239.30  | 1624.43  | 67.54    | 9.10   | 124.79  | 4.93   |
| 26 | -1 | 1   | 5  | 7.95  | 662.72   | 1258.09  | 17.94    | -33.19 | 70.74   | -8.42  |
| 27 | 3  | 1   | 5  | 14.03 | 84.30    | 240.93   | 11.71    | -13.38 | 25.08   | -6.24  |
| 28 | 3  | -12 | 6  | 24.79 | 1148.75  | 773.86   | 62.22    | 6.03   | 86.85   | 4.32   |
| 29 | 2  | -11 | 6  | 21.74 | 518.69   | 872.92   | 42.93    | -8.25  | 68.56   | -5.17  |
| 30 | 1  | -7  | 6  | 14.98 | 112.80   | 27.76    | 18.21    | 4.67   | 21.50   | 3.95   |
| 31 | 3  | -2  | 6  | 15.01 | 76.06    | 29.12    | 10.76    | 4.36   | 14.80   | 3.17   |
| 32 | -6 | -6  | 7  | 26.12 | 26.05    | 97.88    | 16.52    | -4.35  | 21.17   | -3.39  |
| 33 | 5  | -4  | 7  | 22.96 | 101.55   | 200.02   | 23.23    | -4.24  | 31.12   | -3.16  |
| 34 | 4  | -2  | 7  | 19.04 | -6.08    | 100.62   | 9.91     | -10.77 | 16.01   | -6.67  |
| 35 | 2  | 1   | 7  | 13.41 | 3849.96  | 3192.61  | 115.82   | 5.68   | 212.55  | 3.09   |
| 36 | 0  | 0   | 8  | 11.68 | 225.66   | 683.82   | 15.10    | -30.34 | 44.62   | -10.27 |
| 37 | 4  | 0   | 8  | 19.93 | 22.17    | 124.44   | 11.31    | -9.04  | 18.58   | -5.51  |
| 38 | 3  | -12 | 9  | 27.00 | 38.54    | 211.15   | 22.29    | -7.74  | 29.77   | -5.80  |
| 39 | 4  | -5  | 9  | 22.28 | 538.44   | 371.57   | 40.97    | 4.07   | 54.81   | 3.04   |
| 40 | -1 | -4  | 9  | 14.76 | 497.28   | 264.36   | 23.52    | 9.90   | 39.42   | 5.91   |
| 41 | 3  | -3  | 9  | 18.63 | 12667.89 | 10009.13 | 332.99   | 7.98   | 617.95  | 4.30   |
| 42 | 4  | 3   | 9  | 21.91 | 168.79   | 321.39   | 23.14    | -6.59  | 35.87   | -4.25  |
| 43 | -1 | -1  | 10 | 14.77 | 91.67    | 35.68    | 12.57    | 4.45   | 16.87   | 3.32   |
| 44 | 1  | -1  | 11 | 17.01 | 611.21   | 806.90   | 25.81    | -7.58  | 58.76   | -3.33  |
| 45 | 5  | -1  | 11 | 26.29 | -16.47   | 44.04    | 17.44    | -3.47  | 19.26   | -3.14  |
| 46 | -5 | 0   | 11 | 23.39 | 3462.13  | 2836.86  | 105.98   | 5.90   | 193.03  | 3.24   |
| 47 | -6 | 2   | 11 | 26.56 | 1197.97  | 912.75   | 64.56    | 4.42   | 92.26   | 3.09   |
| 48 | -1 | 2   | 11 | 16.61 | 2265.61  | 1788.87  | 49.15    | 9.70   | 120.91  | 3.94   |
| 49 | 4  | -4  | 12 | 25.21 | 2843.95  | 2012.91  | 96.16    | 8.64   | 158.82  | 5.23   |
| 50 | -1 | -3  | 12 | 18.26 | 1191.80  | 934.18   | 38.43    | 6.70   | 76.81   | 3.35   |
| 51 | -2 | -2  | 12 | 18.67 | 482.45   | 713.28   | 35.92    | -6.43  | 59.51   | -3.88  |
| 52 | -3 | -2  | 14 | 22.74 | 4424.91  | 3675.71  | 102.03   | 7.34   | 226.16  | 3.31   |
| 53 | 0  | 1   | 14 | 20.88 | 900.80   | 630.34   | 36.53    | 7.40   | 63.32   | 4.27   |
| 54 | -1 | -3  | 15 | 22.67 | 168.11   | 388.96   | 64.83    | -3.41  | 71.47   | -3.09  |
| 55 | 0  | 4   | 15 | 23.61 | 627.52   | 398.76   | 47.43    | 4.82   | 61.41   | 3.73   |
| 56 | 1  | 0   | 17 | 26.22 | 291.62   | 36.82    | 53.66    | 4.75   | 56.39   | 4.52   |

Average = 0.62 0.47

Note: SigW(I) is the SHELXL optimized weight

For I(calc) < 2 Sigma(I): = 13.21 and = 13.53

### Section 3

Missing Reflections (Asym. Refl. Unit) below sin(th)/lambda = 0.600

| Nr | H  | K  | L  | sin(th)/lambda | Theta | I(calc)   | I(calc)/I(max) |
|----|----|----|----|----------------|-------|-----------|----------------|
| 1  | 0  | 1  | 0  | 0.041          | 1.65* | 4296.53   | 0.16688        |
| 2  | 0  | 4  | 0  | 0.162          | 6.63  | 29240.04  | 1.13571        |
| 3  | 0  | -2 | 1  | 0.088          | 3.57  | 25620.82  | 0.99513        |
| 4  | -1 | -1 | 1  | 0.102          | 4.14  | 31693.94  | 1.23102        |
| 5  | 0  | 0  | 1  | 0.036          | 1.45* | 262.36    | 0.01019        |
| 6  | 1  | 1  | 1  | 0.109          | 4.45  | 33913.13  | 1.31721        |
| 7  | 0  | 3  | 1  | 0.128          | 5.22  | 13882.72  | 0.53922        |
| 8  | -1 | 4  | 1  | 0.184          | 7.52  | 34522.66  | 1.34089        |
| 9  | 0  | -2 | 2  | 0.106          | 4.33  | 31094.47  | 1.20773        |
| 10 | 1  | 1  | 2  | 0.129          | 5.24  | 46021.09  | 1.78750        |
| 11 | 0  | 2  | 2  | 0.110          | 4.48  | 12198.89  | 0.47381        |
| 12 | -2 | 3  | 2  | 0.217          | 8.89  | 38239.66  | 1.48526        |
| 13 | -1 | -2 | 3  | 0.154          | 6.30  | 32762.61  | 1.27253        |
| 14 | 1  | -1 | 3  | 0.150          | 6.11  | 181815.84 | 7.06187        |
| 15 | 0  | -2 | 4  | 0.162          | 6.59  | 31610.19  | 1.22777        |
| 16 | -1 | 0  | 4  | 0.159          | 6.50  | 21460.98  | 0.83356        |
| 17 | -2 | 1  | 4  | 0.218          | 8.92  | 27975.17  | 1.08658        |
| 18 | 0  | 3  | 4  | 0.191          | 7.78  | 29378.74  | 1.14109        |
| 19 | -1 | 2  | 5  | 0.207          | 8.47  | 38326.84  | 1.48865        |
| 20 | 2  | -2 | 6  | 0.300          | 12.30 | 44942.54  | 1.74560        |
| 21 | 6  | -2 | 6  | 0.597          | 25.11 | 263.34    | 0.01023        |
| 22 | 3  | 3  | 13 | 0.578          | 24.27 | 549.90    | 0.02136        |
| 23 | 2  | 3  | 15 | 0.599          | 25.21 | 617.56    | 0.02399        |

\*\* Note: I(max) is the maximum I(obs) encountered in the fcf-file \*\*

Starred Reflections have a Theta below Theta(Min) = 2.16

From CIF: Theta(Min) = 2.16

### Section 4

Resolution & Completeness Statistics (Cumulative and Friedel Pairs Averaged)

| Theta                      | sin(th)/Lambda | Complete | Expected | Measured | Total | Missing |
|----------------------------|----------------|----------|----------|----------|-------|---------|
| 20.82                      | 0.500          | 0.990    | 2059     | 2039     | 20    |         |
| 23.01                      | 0.550          | 0.993    | 2735     | 2715     | 20    |         |
| 25.24                      | 0.600          | 0.994    | 3543     | 3520     | 23    |         |
| ----- ACTA Min. Res. ----- |                |          |          |          |       |         |
| 27.48                      | 0.649          | 0.987    | 4499     | 4439     | 60    |         |

Note: The Reported Completeness refers to the Actual H,K,L Index Range

### Section 5

R-Value Statistics as a Function of Resolution (in Resolution Shell)

| Theta | sin(Th)/L | #   | R1    | wR2   | S     | Rs    | av(I/SigW) | av(I)   | av(SigW) |
|-------|-----------|-----|-------|-------|-------|-------|------------|---------|----------|
| 12.38 | 0.302     | 438 | 0.026 | 0.088 | 1.354 | 0.015 | 14.17      | 3974.30 | 209.50   |
| 15.68 | 0.380     | 444 | 0.025 | 0.082 | 1.150 | 0.020 | 12.54      | 2458.73 | 140.31   |
| 18.02 | 0.435     | 440 | 0.023 | 0.070 | 0.888 | 0.029 | 11.20      | 1785.35 | 112.74   |
| 19.90 | 0.479     | 465 | 0.028 | 0.086 | 0.982 | 0.037 | 9.73       | 1270.06 | 89.27    |
| 21.51 | 0.516     | 447 | 0.032 | 0.090 | 0.944 | 0.047 | 8.85       | 1043.60 | 81.18    |
| 22.94 | 0.548     | 460 | 0.037 | 0.102 | 0.937 | 0.061 | 7.52       | 737.45  | 67.11    |
| 24.22 | 0.577     | 447 | 0.044 | 0.115 | 0.901 | 0.077 | 6.25       | 546.17  | 58.33    |
| 25.40 | 0.603     | 436 | 0.043 | 0.124 | 0.926 | 0.087 | 5.78       | 532.83  | 61.08    |
| 26.49 | 0.628     | 436 | 0.062 | 0.163 | 0.997 | 0.118 | 4.71       | 352.41  | 51.59    |
| 27.48 | 0.649     | 426 | 0.060 | 0.169 | 0.949 | 0.133 | 4.20       | 320.04  | 51.21    |

R(sig) = sum(sig(I)) / sum(I) = 0.0362

From FCF: R1 = 0.0333( 3662), wR2 = 0.0960( 4439), S = 1.043  
From CIF: R1 = 0.0333( 3662), wR2 = 0.0960( 4439), S = 1.043, Npar = 263

No (SHELXL) Optimized Weights: wR2 = 0.0667, S = 2.08

### Section 6

Summary of Reflection Data in FCF - Note: Friedel Pairs Averaged

Total # of Reflections in FCF. 4439 (Hmax = 7, Kmax = 15, Lmax = 18) Obs  
Number above Rep. Theta(Max) . 0  
Actual Theta(Max) (Deg.) ... 27.484 (Hmax = 7, Kmax = 15, Lmax = 18) Exp

Reported Theta(Max) (Deg.) ... 27.484 (Hmax = 7, Kmax = 15, Lmax = 18) Rep  
Actual Theta(Min) (Deg.) ... 2.163  
Reported Theta(Min) (Deg.) ... 2.163

Unique (Expected) ..... 4499  
Unique (in FCF) ..... 4439  
Observed [I .gt. 2 Sig(I)] ... 3662  
Less-Thans ..... 777  
Negative Intensities ..... 249  
Negative Intensities < - 2 SIG 0

Missing (Total) ..... 60  
Missing Below Th(Min) ..... 2  
Missing Th(Min) to STh/L=0.600 21  
Missing STh/L=0.600 to Th(Max) 37  
Missing Very Strong Refl. .... 14  
Beamstop Effectd Reflections 0

Space Group Absences ..... 0

#### Intensity Distribution [Decay of I/Sigma(I) versus sin(theta)/lambda]

| sh | st/l  | Ang   | #   | 0.25              | 1.0  | 2.0  | Percent | Distr. for I .gt. 2.0 * sig(I) |
|----|-------|-------|-----|-------------------|------|------|---------|--------------------------------|
| 1  | 0.301 | 1.661 | 434 | 98.8              | 97.9 | 97.0 | *****   |                                |
| 2  | 0.379 | 1.318 | 442 | 98.6              | 96.8 | 94.6 | *****   |                                |
| 3  | 0.434 | 1.152 | 432 | 95.1              | 93.5 | 92.1 | *****   |                                |
| 4  | 0.478 | 1.046 | 468 | 94.9              | 91.2 | 87.8 | *****   |                                |
| 5  | 0.515 | 0.971 | 440 | 95.0              | 90.5 | 85.0 | *****   |                                |
| 6  | 0.547 | 0.914 | 453 | 92.3              | 88.1 | 80.1 | *****   |                                |
| 7  | 0.576 | 0.868 | 448 | 91.1              | 83.7 | 78.3 | *****   |                                |
| 8  | 0.602 | 0.830 | 434 | 88.5              | 80.4 | 73.5 | *****   |                                |
| 9  | 0.626 | 0.798 | 432 | 87.7              | 80.1 | 72.7 | *****   |                                |
| 10 | 0.649 | 0.771 | 437 | 87.4              | 76.2 | 64.5 | *****   |                                |
| 11 | 0.670 | 0.747 | 19  | 84.2              | 63.2 | 57.9 | *****   |                                |
|    |       |       |     | Percent Observed: |      |      | I 0     | I 50                           |
|    |       |       |     |                   |      |      |         | I 100                          |

Maximum Percentage of Reflections with I .gt. 2\*s(I) in any Resolution Shell 97

#### Section 7

Analysis of Variance (F(obs) and F(calc) from FCF)

:: Hmax = 7, Kmax = 15, Lmax = 18

:: SigW(I) Includes the SHELXL WGHT a & b Parameter Values 0.0456 2.2153

:: K = Mean[Fo^2]/Mean[Fc^2] for Group - (Fo^2, Fc^2 from FCF)

|                 |       |       |       |       |       |       |       |       |       |       |       |
|-----------------|-------|-------|-------|-------|-------|-------|-------|-------|-------|-------|-------|
| Fc/Fc(max)      | 0.000 | 0.021 | 0.043 | 0.067 | 0.095 | 0.128 | 0.163 | 0.206 | 0.267 | 0.372 | 1.000 |
| Number in Group | 445   | 445   | 443   | 444   | 443   | 444   | 444   | 444   | 444   | 444   | 443   |
| Goof            | 0.902 | 1.069 | 1.049 | 1.078 | 1.209 | 0.874 | 1.076 | 1.092 | 0.986 | 1.055 |       |
| K               | 0.842 | 0.925 | 0.952 | 0.972 | 0.975 | 0.990 | 0.995 | 1.014 | 1.013 | 1.015 |       |

|                 |       |       |       |       |       |       |       |       |       |       |      |
|-----------------|-------|-------|-------|-------|-------|-------|-------|-------|-------|-------|------|
| Resolution(A)   | 0.77  | 0.80  | 0.83  | 0.87  | 0.91  | 0.97  | 1.05  | 1.15  | 1.31  | 1.65  | 9.41 |
| Number in Group | 445   | 444   | 444   | 444   | 443   | 443   | 445   | 444   | 444   | 442   |      |
| Goof            | 0.969 | 1.036 | 0.934 | 0.952 | 0.962 | 0.969 | 1.017 | 0.924 | 1.182 | 1.395 |      |
| K               | 0.990 | 1.008 | 1.011 | 1.016 | 1.021 | 1.022 | 1.015 | 1.006 | 1.002 | 1.011 |      |

Resolution Dependence for Fc/Fc(max) .LT. 0.043

|                 |       |       |       |       |       |       |       |       |       |       |      |
|-----------------|-------|-------|-------|-------|-------|-------|-------|-------|-------|-------|------|
| Resolution(A)   | 0.77  | 0.80  | 0.83  | 0.87  | 0.91  | 0.97  | 1.05  | 1.15  | 1.31  | 1.65  | 9.41 |
| Number in Group | 149   | 116   | 120   | 98    | 101   | 78    | 65    | 66    | 56    | 41    |      |
| Goof            | 0.931 | 1.058 | 0.893 | 0.936 | 0.815 | 0.934 | 0.898 | 0.905 | 1.404 | 1.134 |      |
| K               | 1.074 | 0.825 | 0.739 | 0.757 | 0.866 | 0.791 | 0.840 | 0.954 | 1.236 | 1.127 |      |

|            |     |     |     |     |     |     |     |    |  |  |  |
|------------|-----|-----|-----|-----|-----|-----|-----|----|--|--|--|
| Abs(H)     | 0   | 1   | 2   | 3   | 4   | 5   | 6   | 7  |  |  |  |
| Number     | 446 | 885 | 845 | 757 | 645 | 485 | 289 | 87 |  |  |  |
| PerObs Fo2 | 83  | 81  | 81  | 78  | 77  | 74  | 65  | 61 |  |  |  |
| PerObs Fc2 | 81  | 81  | 82  | 80  | 77  | 75  | 68  | 60 |  |  |  |

|            |     |     |     |     |     |     |     |     |     |     |     |     |     |     |
|------------|-----|-----|-----|-----|-----|-----|-----|-----|-----|-----|-----|-----|-----|-----|
| Abs(K)     | 0   | 1   | 2   | 3   | 4   | 5   | 6   | 7   | 8   | 9   | 10  | 11  | 12  | 13  |
| Number     | 208 | 416 | 404 | 397 | 389 | 377 | 355 | 341 | 316 | 287 | 253 | 221 | 183 | 143 |
| PerObs Fo2 | 83  | 80  | 82  | 80  | 79  | 81  | 79  | 79  | 78  | 78  | 74  | 72  | 69  | 69  |
| PerObs Fc2 | 82  | 80  | 82  | 81  | 80  | 82  | 81  | 80  | 79  | 79  | 75  | 71  | 68  | 68  |

|            |     |     |     |     |     |     |     |     |     |     |     |     |     |     |
|------------|-----|-----|-----|-----|-----|-----|-----|-----|-----|-----|-----|-----|-----|-----|
| Abs(L)     | 0   | 1   | 2   | 3   | 4   | 5   | 6   | 7   | 8   | 9   | 10  | 11  | 12  | 13  |
| Number     | 181 | 360 | 358 | 353 | 345 | 333 | 324 | 311 | 294 | 275 | 257 | 237 | 207 | 181 |
| PerObs Fo2 | 85  | 84  | 83  | 83  | 79  | 83  | 77  | 80  | 77  | 77  | 79  | 73  | 72  | 72  |
| PerObs Fc2 | 84  | 83  | 84  | 85  | 80  | 83  | 79  | 79  | 78  | 78  | 79  | 75  | 71  | 73  |

I-----I-----I-----I-----I-----I-----I-----I-----I-----I

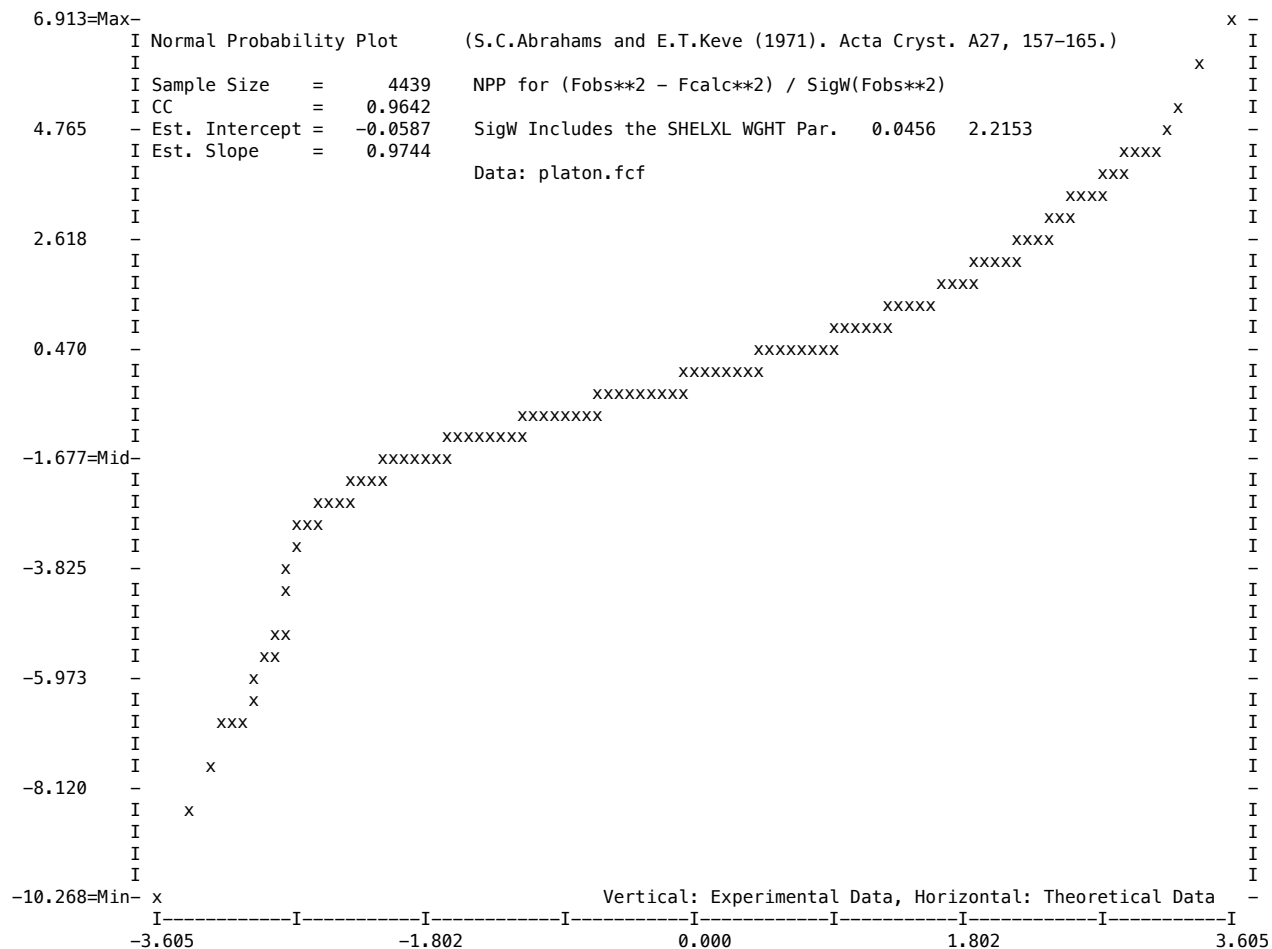

Section 8

=====  
Check for Unaccounted Twinning with the TwinRotMat Algorithm - N(selec) = 50  
=====  
Note: This Analysis is Based on Fc calculated from Coordinates in the CIF.  
=====

2-axis ( 1 -1 3 ) [ 5 -1 2 ], Angle ( ) [ ] = 6.96 Deg, Freq = 28  
\*\*\*\*\*

(-0.217 -0.119 0.366) (h1) (h2) Nr Overlap = 242  
(-0.783 -0.881 -0.366) \* (k1) = (k2) BASF = 0.25  
( 2.348 -0.358 0.098) (l1) (l2) DEL-R = -0.010

No Applicable Twin Law(s) Detected from Fo/Fc Analysis-or Already Accounted for

Section 8

=====  
Check for Unaccounted Twinning with the TwinRotMat Algorithm - N(selec) = 50  
=====  
Note: This Analysis is Based on Fc Taken from Fo/Fc File (FCF)  
=====

No Applicable Twin Law(s) Detected from Fo/Fc Analysis-or Already Accounted for

# R= 0.0333( 3662), wR2= 0.0960( 4439), S = 1.043 (From FCF data only)  
# R= 0.0333( 3662), wR2= 0.0960( 4439), S = 1.043, Npar= 263

Section 12: ASYM Reflection Averaging Listing (Embedded hkl Data)

=====  
PLATON(V- 60124)-Run for: ep-91\_a.res in P-1  
=====  
TIME: Feb 15 10:16:45 2024  
=====  
(C) 1980-2024 A.L.Spek  
=====

| Input Cell (Lattice Type: P) |            |          |         | Temp = 0K        | Reduced Cell | (Acta Cryst.(1976),A32,297-298) |         |                 |
|------------------------------|------------|----------|---------|------------------|--------------|---------------------------------|---------|-----------------|
| a =                          | 5.6690(4)  | Angstrom | alpha = | 91.644(6) Degree | a =          | 5.669                           | alpha = | 91.64 V = 980.5 |
| b =                          | 12.3300(9) |          | beta =  | 96.314(6)        | b =          | 12.330                          | beta =  | 96.31           |

```

c =      14.1339(9)          gamma =      92.400(6)          c =      14.134      gamma =      92.40
V =      980.537 Cubic-Angstrom      d(100) =      5.6288      Angstrom      Niggli Values
                                         d(010) =      12.3123      32.138  152.029  199.767
Lambda(MoKa) =      0.71073 Angstrom      d(001) =      14.0403      -4.999   -8.812   -2.927

```

```

=====
Orthogonalization Matrices
=====

```

(See e.g. J.D.Dunitz, Xray Analysis and Structure Determination of Organic Molecules, Cornell Univ. Press, 1979, P236)

```

(X0) ( 5.66900 -0.51633 -1.55441 ) (X) , (X) ( 0.17640 0.00739 0.01978 ) (X0)      Orthogonal Axes A0, B0 and C0
(Y0) = ( 0 12.31918 -0.47100 )*(Y) , (Y) = ( 0 0.08117 0.00272 )*(Y0)      are defined as:
(Z0) ( 0 0 14.04027 ) (Z) , (Z) ( 0 0 0.07122 ) (Z0)      A0 // A, C0 // C*, B0 // C0 X A0

```

```

=====
Space Group Symmetry
=====

```

(See e.g. G. Burns & A.M. Glazer, Space Groups for Solid State Scientists, Academic Press, 1990 or Int. Tables A)

```

Space Group H-M: P-1          Laue: -1
Space Group Hall: -P 1          [Schoenflies: Ci^1 ]
Lattice Type: aP, Centric,      Triclinic, Multiplicity: 2( 1), No: 2

```

Non-Sohnke - No Absolute Structure

```

Nr      ***** Symmetry Operation(s) *****

```

```

1      X ,      Y ,      Z
2      - X ,      - Y ,      - Z

```

```

:: Reflection Data are READ from File : lasym.hkl - ( OBS-Data)

```

```

:: Reflection Data are READ from File : lasym.hkl - ( OBS-Data)

```

```

:: Hmax = 0 Kmax = 0 Lmax= 0 , Sorting Order : Fast H, Medium K, Slow L

```

```

:: No Recognizable Reflections Encountered for ep-91_a.re

```

```

=====
***** N O T I C E *****
=====

```

- PLATON Reference : Spek, A.L. (2003). J. Appl. Cryst. 36, 7-13.  
 Spek, A.L. (2009). Acta Cryst. D65, 148-155.  
 Spek, A.L. (2015). Acta Cryst. C71, 9-18.

- Output Values (Esd) may have been set to 99, 999 or 9999 to Avoid Format Overflow

- Derived Parameter SU's (= Esd's) may be Incorrect in Cases where Covariances in the Atom Parameters should have been taken into Account (e.g. Those Involving Atoms That were Refined with Constraints)

- ROUNDING, in particular of the Input Coordinate Data, may give deviating values for derived geometry parameters. However, differences should be within the associated esd-range.

- PLATON is NOT a Finished Program. The Implementation of Additional Options is Planned. Some of the More Advanced Features are Experimental and may Contain Loose Ends.

- The Communication of Glitches Encountered will be Appreciated: E-mail: a.l.spek@uu.nl

- Recent versions of PLATON may be obtained from <http://www.platonsoft.nl/xraysoft>

- More INFO can be found on <http://http://www.platonsoft.nl/>

```

=====
Page - Index
=====

```

```

Page 1 --- ASYM
Page 3 --- SUMMARY

```

```

=====
Summary and Remarks : N = NOTE, W = WARNING, E = ERROR
=====

```

N: No S.U.'s (esd) on observed/calculated parameters.

=====

:: Input Xtal Data from File lasym.ins - Data Type RES

:: NORMAL END of PLATON : 4 Pages on FILE lasym.lis
