# Supplementary material for: 1,4-Diiodotetrafluorobenzene 3,5-Di-(Pyridin-4-Yl)-1,2, 4-Thiadiazole
Source: Preprints.org preprint supplement (doi:10.20944/preprints202403.0264.v1), 2024-03-06
Supplement: Supplementary file 5 [file supplementary]

## SUPPLEMENTARY MATERIALS

### **Halogen-bonded co-crystal of 3,5-di-(pyridin-4-yl)-1,2,4-thiadiazole and 1,4-diiodotetrafluorobenzene**

Enrico Podda <sup>1,2\*</sup>, Anna Pintus <sup>1</sup>, Vito Lippolis <sup>1</sup>, Francesco Isaia <sup>1</sup>, Alexandra M. Z. Slawin <sup>3</sup>, Cameron L. Carpenter-Warren <sup>3</sup>, J. Derek Woollins <sup>4</sup>, and M. Carla Aragoni <sup>1\*</sup>

<sup>1</sup> Dipartimento di Scienze Chimiche e Geologiche, Università degli Studi di Cagliari, S.S. 554 bivio Sestu, Monserrato, 09042 Cagliari, Italy

<sup>2</sup> Centro Servizi di Ateneo per la Ricerca (CeSAR), Università degli Studi di Cagliari, S.S. 554 bivio Sestu, Monserrato, 09042 Cagliari, Italy

<sup>3</sup> EaStCHEM School of Chemistry, University of St Andrews, St Andrews, United Kingdom

<sup>4</sup> Department of Chemistry, Khalifa University, Abu Dhabi, United Arab Emirates

Correspondence: enrico.podda@unica.it (E. P.); aragoni@unica.it (M. C. A.)

**Figure S1** Solid-state FT-IR spectrum of compound **1** (500–3500 cm<sup>-1</sup>, KBr pellet).

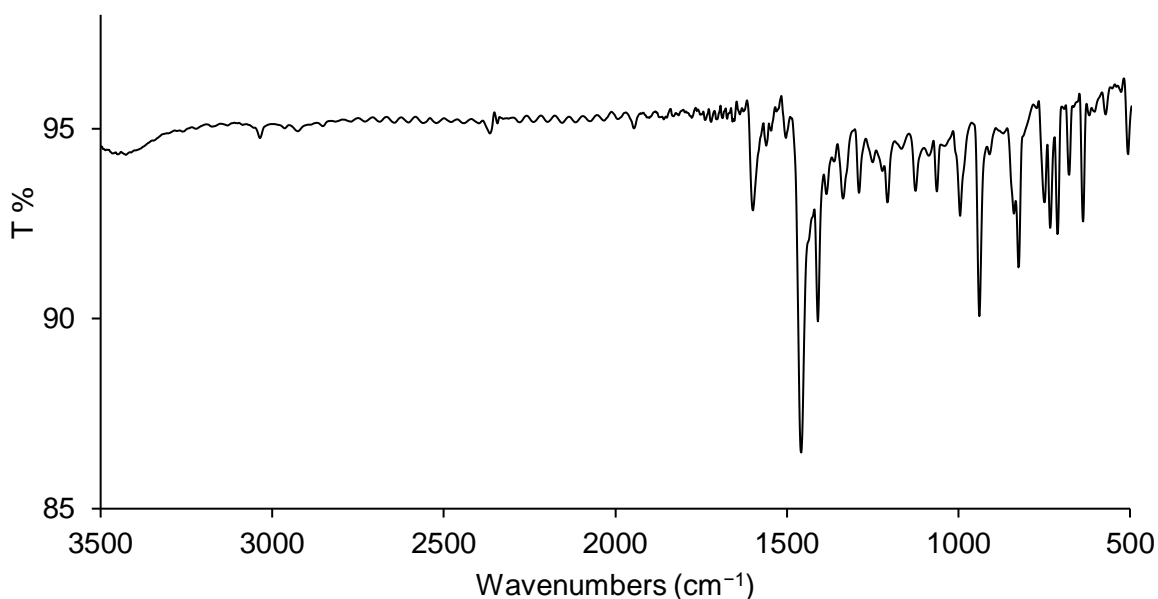

**Table S1** Crystal data and structure refinement parameters for compound **1**.

|                                                       |                                                                               |
|-------------------------------------------------------|-------------------------------------------------------------------------------|
| Empirical formula                                     | C <sub>18</sub> H <sub>8</sub> F <sub>4</sub> I <sub>2</sub> N <sub>4</sub> S |
| Formula weight                                        | 642.14                                                                        |
| Temperature/K                                         | 173(2)                                                                        |
| Crystal system                                        | triclinic                                                                     |
| Space group                                           | <i>P</i> -1                                                                   |
| <i>a</i> /Å                                           | 5.6690(4)                                                                     |
| <i>b</i> /Å                                           | 12.3300(9)                                                                    |
| <i>c</i> /Å                                           | 14.1339(9)                                                                    |
| $\alpha$ /°                                           | 91.644(6)                                                                     |
| $\beta$ /°                                            | 96.314(6)                                                                     |
| $\gamma$ /°                                           | 92.400(6)                                                                     |
| Volume/Å <sup>3</sup>                                 | 980.54(12)                                                                    |
| <i>Z</i>                                              | 2                                                                             |
| $\rho_{\text{calc}}$ / g·cm <sup>-3</sup>             | 2.175                                                                         |
| $\mu$ /mm <sup>-1</sup>                               | 3.363                                                                         |
| Crystal size/mm <sup>3</sup>                          | 0.40 × 0.09 × 0.07                                                            |
| Radiation                                             | MoK $\alpha$ ( $\lambda$ = 0.71073)                                           |
| 2 $\theta$ range for data collection/°                | 4.326 to 54.968                                                               |
| Index ranges                                          | -7 ≤ <i>h</i> ≤ 7, -15 ≤ <i>k</i> ≤ 15, 0 ≤ <i>l</i> ≤ 18                     |
| Data/restraints/parameters                            | 4439/0/263                                                                    |
| Goodness-of-fit on <i>F</i> <sup>2</sup>              | 1.043                                                                         |
| Final R indexes [ <i>I</i> ≥ 2 $\sigma$ ( <i>I</i> )] | <i>R</i> <sub>1</sub> = 0.0333, <i>wR</i> <sub>2</sub> = 0.0873               |
| Final R indexes [all data]                            | <i>R</i> <sub>1</sub> = 0.0450, <i>wR</i> <sub>2</sub> = 0.0960               |
| Largest diff. peak/hole / e·Å <sup>-3</sup>           | 1.03/-0.71                                                                    |

**Table S2** Bond lengths (Å) for compound **1**.

|                    |          |         |          |
|--------------------|----------|---------|----------|
| N1–I1              | 2.801(5) | C8–C12  | 1.392(7) |
| N4–I2 <sup>i</sup> | 2.947(4) | C8–C9   | 1.369(6) |
| I1–C13             | 2.101(4) | C8–C7   | 1.497(6) |
| I2–C16             | 2.091(4) | C4–C3   | 1.393(6) |
| S1–N3              | 1.618(4) | C4–C5   | 1.376(7) |
| S1–C6              | 1.708(5) | C13–C18 | 1.379(7) |
| F3–C18             | 1.339(5) | C13–C14 | 1.393(6) |
| F4–C17             | 1.350(5) | C3–C6   | 1.489(6) |
| F1–C14             | 1.347(5) | C3–C2   | 1.376(7) |
| F2–C15             | 1.338(5) | C12–C11 | 1.381(7) |
| N3–C7              | 1.345(6) | C18–C17 | 1.371(6) |
| N2–C7              | 1.367(6) | C9–C10  | 1.371(7) |
| N2–C6              | 1.314(6) | C14–C15 | 1.374(6) |
| N1–C5              | 1.341(7) | C1–C2   | 1.376(7) |
| N1–C1              | 1.318(7) | C16–C17 | 1.373(6) |
| N4–C10             | 1.343(7) | C16–C15 | 1.402(6) |
| N4–C11             | 1.332(6) |         |          |

Symmetry code: <sup>i</sup> = 2+x, -1+y, -1+z.**Table S3** Bond angles (°) for compound **1**.

|                                      |          |             |          |
|--------------------------------------|----------|-------------|----------|
| N1–I1–C13                            | 177.4(2) | F1–C14–C13  | 120.5(4) |
| N4–I2 <sup>i</sup> –C16 <sup>i</sup> | 168.3(2) | F1–C14–C15  | 118.1(4) |
| N3–S1–C6                             | 93.2(2)  | C15–C14–C13 | 121.4(4) |
| C7–N3–S1                             | 107.6(3) | N1–C1–C2    | 124.1(5) |
| C6–N2–C7                             | 107.5(4) | C17–C16–I2  | 122.7(3) |
| C1–N1–C5                             | 116.7(4) | C17–C16–C15 | 116.9(4) |
| C11–N4–C10                           | 116.9(4) | C15–C16–I2  | 120.3(3) |
| C12–C8–C7                            | 121.3(4) | F4–C17–C18  | 118.5(4) |
| C9–C8–C12                            | 118.4(4) | F4–C17–C16  | 119.7(4) |
| C9–C8–C7                             | 120.3(4) | C18–C17–C16 | 121.8(4) |
| C5–C4–C3                             | 117.8(5) | N3–C7–N2    | 119.1(4) |
| C18–C13–I1                           | 121.9(3) | N3–C7–C8    | 120.3(4) |
| C18–C13–C14                          | 116.8(4) | N2–C7–C8    | 120.6(4) |
| C14–C13–I1                           | 121.3(3) | F2–C15–C14  | 119.0(4) |
| C4–C3–C6                             | 119.9(4) | F2–C15–C16  | 119.9(4) |
| C2–C3–C4                             | 118.6(4) | C14–C15–C16 | 121.1(4) |
| C2–C3–C6                             | 121.5(4) | N4–C10–C9   | 123.8(5) |
| N1–C5–C8                             | 124.0(5) | N2–C6–S1    | 112.6(3) |
| C11–C12–C13                          | 118.9(4) | N2–C6–C3    | 124.4(4) |
| F3–C18–C17                           | 119.3(4) | C3–C6–S1    | 123.0(3) |
| F3–C18–C13                           | 118.8(4) | C1–C2–C3    | 118.7(5) |
| C17–C18–C10                          | 122.0(4) | N4–C11–C12  | 123.1(5) |
| C8–C9–C10                            | 118.9(5) |             |          |

Symmetry code: <sup>i</sup> = 2+x, -1+y, -1+z.
